# Supplementary material for: Dimers of polar chromophores in solution: role of excitonic interactions in one- and two-photon absorption properties
Source: Royal Society of Chemistry journal article supplement (doi:10.1039/c0cp02736g), 2011-01-01

## SUPPORTING INFORMATION

for

### Dimers of polar chromophores in solution: role of excitonic interactions on one- and two-photon absorption properties

F. Todescato<sup>1</sup>, I. Fortunati<sup>1</sup>, S. Carlotto<sup>1</sup>, C. Ferrante<sup>1</sup>,

L. Grisanti<sup>2</sup>, C. Sissa<sup>2</sup>, A. Painelli<sup>2</sup>

A. Colombo<sup>3</sup>, C. Dragonetti<sup>3</sup>, D. Roberto<sup>3</sup>

<sup>1</sup>Dipartimento di Scienze Chimiche e UdR INSTM Padova, Università di Padova, Via Marzolo 1, 35131 Padova, Italy,

<sup>2</sup>Dipartimento di Chimica G.I.A.F. Università di Parma e UdR-INSTM Parma, V.le Usberti 17/A, 43124 Parma, Italy

<sup>3</sup>Dipartimento CIMA "L. Malatesta" dell'Università degli Studi di Milano and UdR INSTM Milano, via Venezian 21, 20133 Milano, Italy.

#### Electronic density in MO for the conformation **du** in CH<sub>2</sub>Cl<sub>2</sub>

Figure SI.1

Electronic density in four molecular orbitals: the HOMO-1, HOMO, LUMO and LUMO+1 for the conformation **du** in CH<sub>2</sub>Cl<sub>2</sub>.

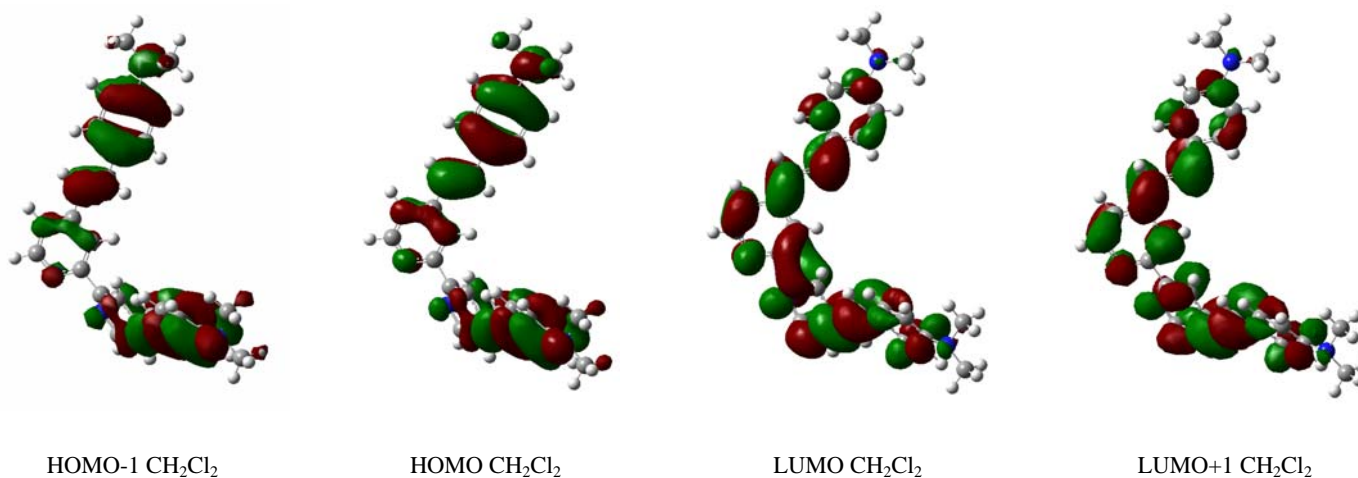

## Some details about the four-state model adopted for 2

The four-state electronic Hamiltonian is described by the following expression:

$$\hat{H}_{el} = \begin{pmatrix} 0 & -\sqrt{2}t & -\sqrt{2}t & 0 \\ -\sqrt{2}t & 2z & 0 & -\sqrt{2}t \\ -\sqrt{2}t & 0 & 2z & -\sqrt{2}t \\ 0 & -\sqrt{2}t & -\sqrt{2}t & 4z+V \end{pmatrix} = 2z(\hat{\rho}_1 + \hat{\rho}_2) - \sqrt{2}t\hat{\sigma}_{12} + V\hat{\rho}_1\hat{\rho}_2 \quad (\text{SI. 1})$$

where the relevant electronic operators are defined as:

$$\hat{\sigma}_{12} = \begin{pmatrix} 0 & 1 & 1 & 0 \\ 1 & 0 & 0 & 1 \\ 1 & 0 & 0 & 1 \\ 0 & 1 & 1 & 0 \end{pmatrix} \quad \hat{\rho}_1 = \begin{pmatrix} 0 & 0 & 0 & 0 \\ 0 & 1 & 0 & 0 \\ 0 & 0 & 0 & 0 \\ 0 & 0 & 0 & 1 \end{pmatrix} \quad \hat{\rho}_2 = \begin{pmatrix} 0 & 0 & 0 & 0 \\ 0 & 0 & 0 & 0 \\ 0 & 0 & 1 & 0 \\ 0 & 0 & 0 & 1 \end{pmatrix} \quad (\text{SI. 2})$$

Following the same steps as described for the monomer, two equivalent harmonic coordinates (one for each chromophore)  $Q_1$  and  $Q_2$  (and the relative momenta  $P_1$  and  $P_2$ ) are introduced to account for molecular vibrations. These vibrations are defined in terms of the same frequency  $\omega_v$  and relaxation energy  $\varepsilon_v$ .

Finally, including the solvent effective coordinates defined for each chromophore,  $q_1$  and  $q_2$ , the essential-state Hamiltonian for the dimer results:

$$\begin{aligned} H_{TOT}(q_1, q_2) = & H_{el+ph+solv} \\ = & 2z(\hat{\rho}_1 + \hat{\rho}_2) - \sqrt{2}t\hat{\sigma} - \omega_v\sqrt{2\varepsilon_v}(Q_1\hat{\rho}_1 + Q_2\hat{\rho}_2) + q_1\hat{\rho}_1 + q_2\hat{\rho}_2 \\ & + \frac{1}{2}\omega_v^2(Q_1^2 + Q_2^2) + \frac{1}{2}(P_1^2 + P_2^2) + \frac{1}{4\varepsilon_{or}}(q_1^2 + q_2^2) \end{aligned} \quad (\text{SI. 3})$$

Solvation coordinates are treated as classical coordinates and the total Hamiltonian is defined on a two-dimensional grid of  $q_1$  and  $q_2$  values. On each point of the grid the coupled electronic and vibrational problem is solved via direct diagonalization of the non-adiabatic basis obtained as the direct product of the four electronic basis states times the eigenstates of the two independent harmonic oscillators. Once again, linear and non-linear spectra are calculated on each point of the  $q_1, q_2$  grid and total spectra are obtained summing up the contributions from each point in the grid weighted by the relevant Boltzmann factor.

More details about the procedure for calculating linear (absorption and fluorescence) and non linear (TPA) optical spectra calculation are described in previous work<sup>1</sup>.

<sup>1</sup> Grisanti, L., et al., *Enhancing the efficiency of two-photon absorption by metal coordination*. Physical Chemistry Chemical Physics, 2009. **11**(41): p. 9450-9457.

**$\theta$ -dependence of calculated linear and non linear spectra for 2 (essential state model)**

Figure SI.2  
Calculated OPA (top panel) and TPA (bottom panel) spectra relevant for **2** in  $\text{CH}_2\text{Cl}_2$  at different values of the angle  $\theta$  (different color), calculated according to the essential-state model described in the paper (parameters are listed in Table 3). Spectra for **1**, multiplied by a factor two, are also reported for comparison (dashed line).

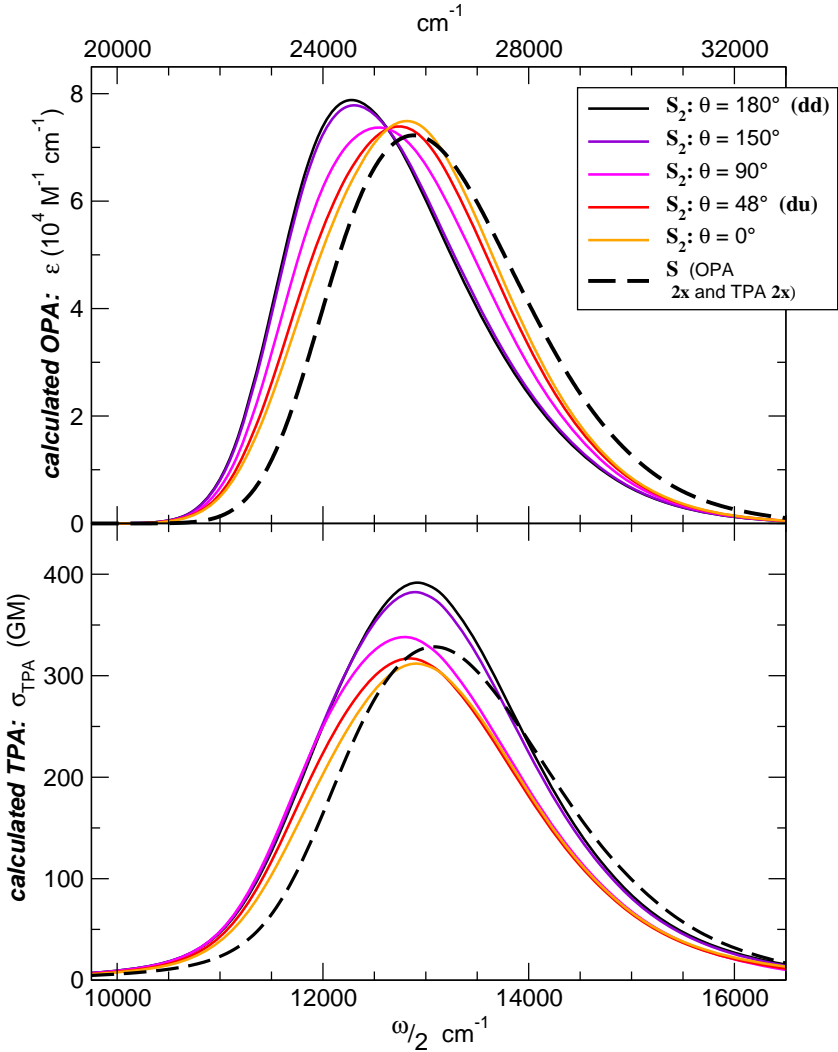

Supplement: c0cp02736g.pdf [file c0cp02736g.pdf]
